# Supplementary material for: Solvent-Induced Assembly of One-Patch Silica Nanoparticles into Robust Clusters, Wormlike Chains and Bilayers
Source: Nanomaterials (Basel). 2021 Dec 29;12(1):100. doi: 10.3390/nano12010100 (PMC8747025; doi:10.3390/nano12010100)
Supplement: Supplementary file 1 [file nanomaterials-12-00100-s001.zip › nanomaterials-1496496 supplement.pdf]

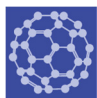

Supplementary materials

# Solvent-induced assembly of one-patch silica nanoparticles into robust clusters, wormlike chains and bilayers

Bin Liu <sup>1,2</sup>, Serge Ravaine <sup>2</sup> and Etienne Duguet <sup>1\*</sup>

<sup>1</sup> Univ. Bordeaux, CNRS, Bordeaux INP, ICMCB, UMR 5026, 33600 Pessac, France; bin.liu-bin@u-bordeaux.fr

<sup>2</sup> Univ. Bordeaux, CNRS, CRPP, UMR 5031, 33600 Pessac, France; serge.ravaine@crpp.cnrs.fr

\* Correspondence: etienne.duguet@icmcb.cnrs.fr; Tel.: +33-540-002-651

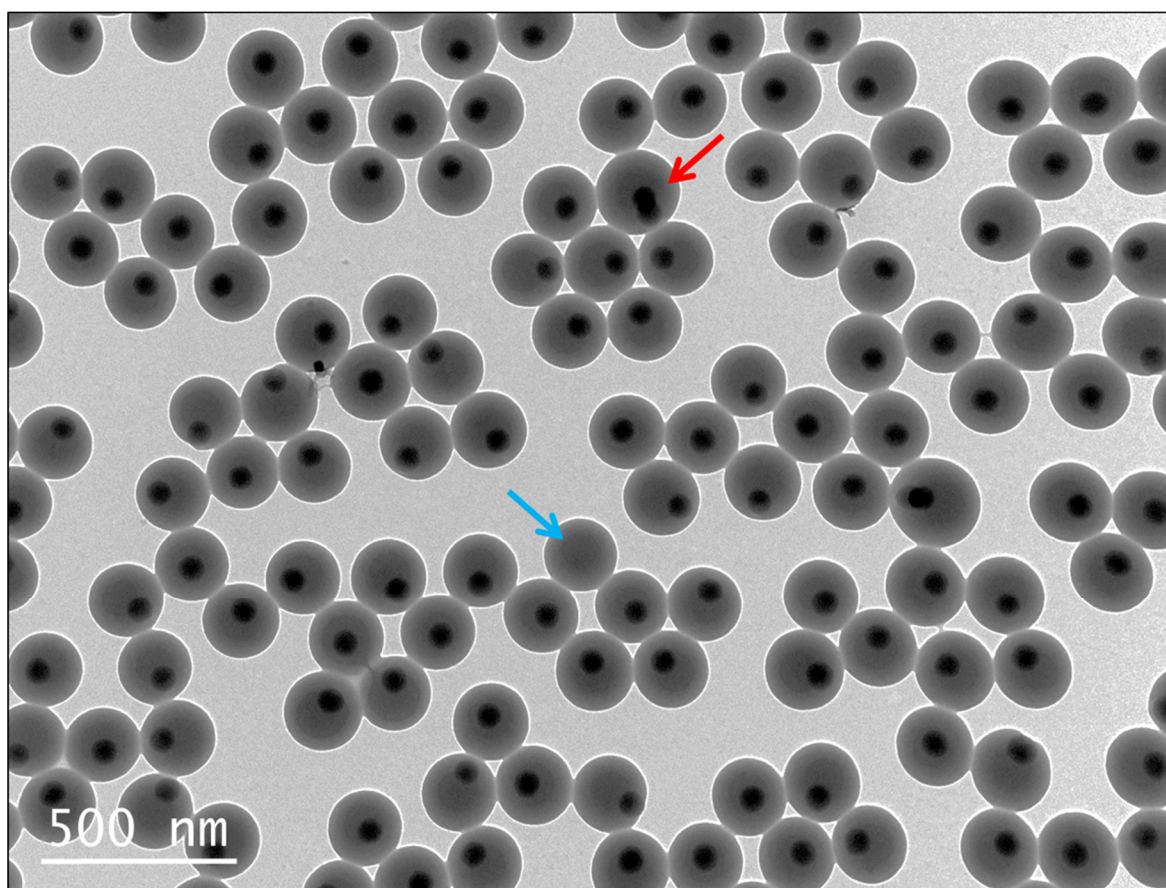

**Figure S1.** Representative TEM image of silica/PS monopod-like nanoparticles as obtained by emulsion polymerization of styrene in the presence of 60-nm silica seeds previously surface-modified with MMS at the nominal grafting surface density of 1 funct./nm<sup>2</sup>. Both arrows evidence the presence of side-products: PS particle with two silica seeds (red arrow) and PS particle without any silica seed (blue arrow, without any consequence on the yield of the forthcoming synthesis of one-patch silica particles because of the PS dissolution stage). The measured morphology yield is 98 % with regard to the silica seeds.

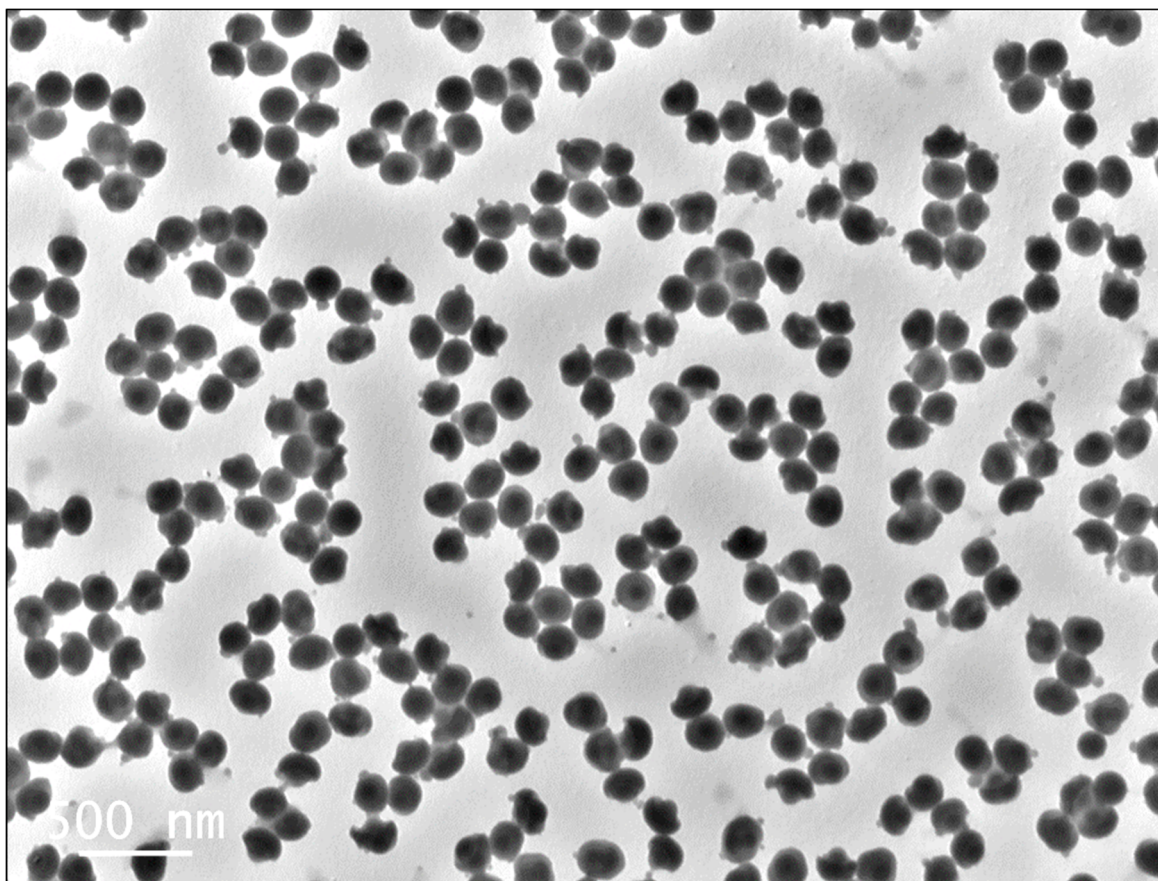

**Figure S2.** Representative low magnification TEM image of 145-nm silica particles with a single 100-nm PS patch ( $S = 0.69$ ). Smaller particles are residual PS nanoparticles resulting from incomplete washing after dissolution in THF.

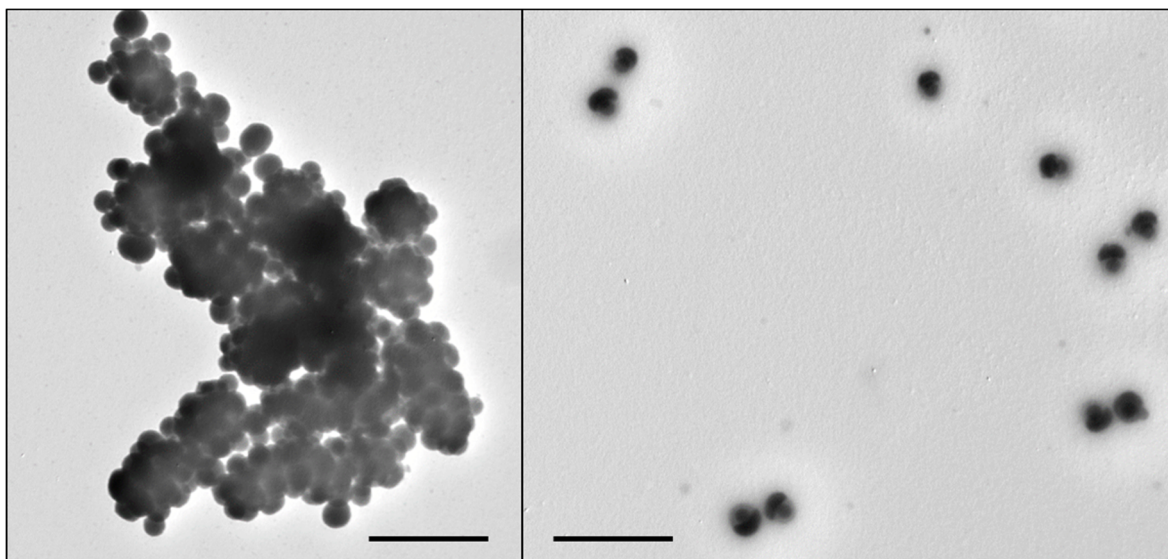

**Figure S3.** Representative TEM images of micelles obtained from 115-nm silica particles ( $S = 0.87$ ) as obtained in a few days in equivolume THF/ethanol mixture (left) before and (right) 10 min after the addition of an additional quantity of THF to lower the ethanol fraction to 20 vol%. Scale bars: 500 nm.

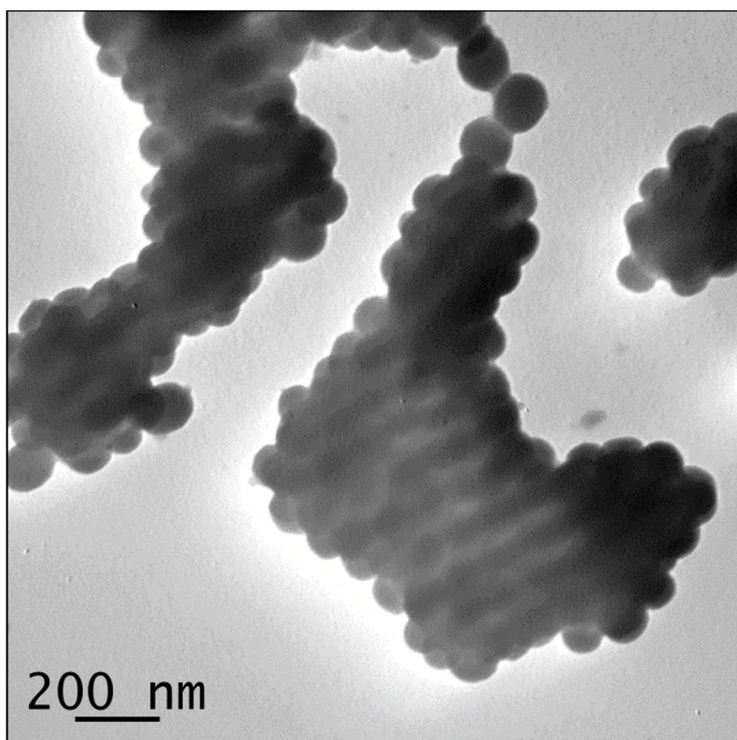

**Figure S4.** Representative TEM image of bilayers obtained from 85-nm silica particles ( $S = 1.18$ ) after 90 min of incubation in equivolume THF/ethanol mixture under ultrasounds (Ultrasonic cleaning bath Fisherbrand™ FB15051 used at room temperature).

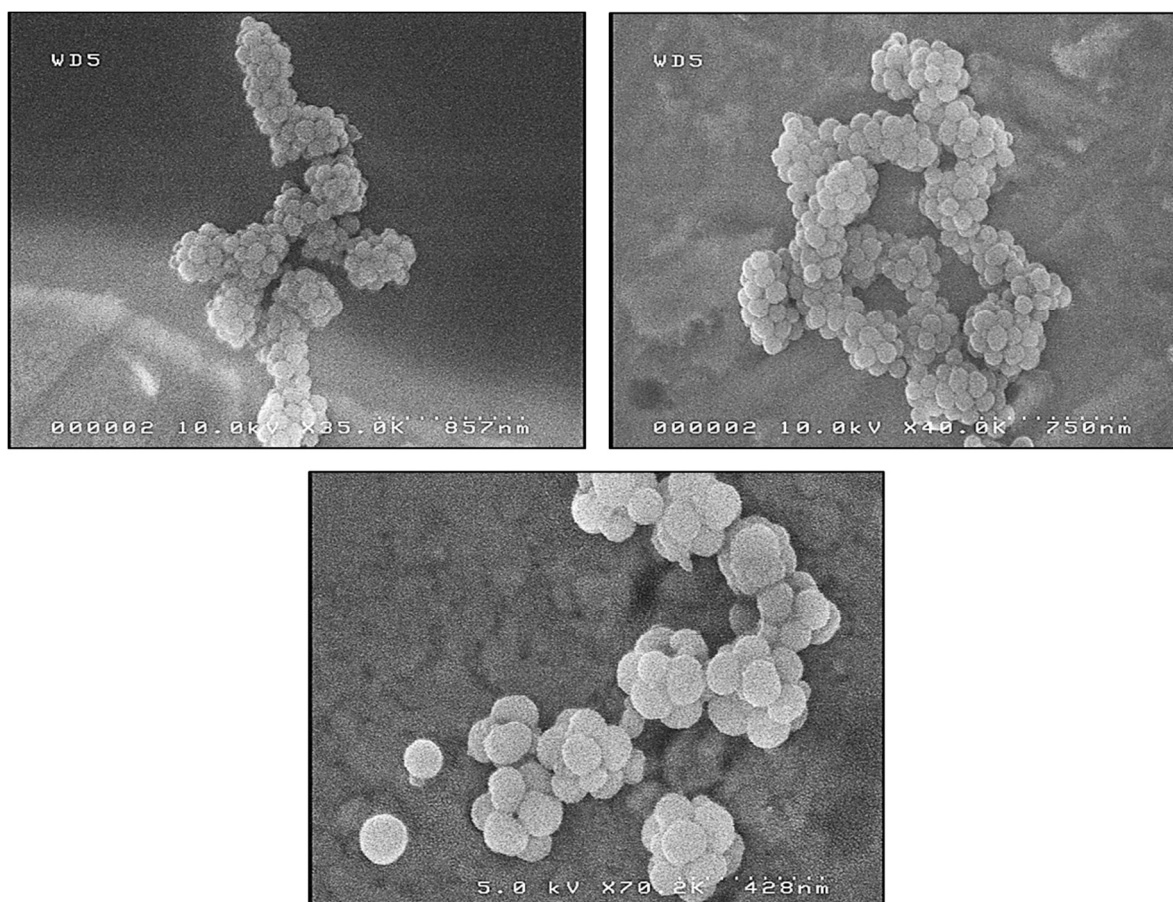

**Figure S5.** Representative scanning electron microscopy (SEM) images of the silica particles present in the incubation medium after 5 days. **Top:** spherical micelles and wormlike chains obtained from silica monomers with  $S = 0.87$ . **Bottom:** large clusters and spherical micelles obtained from silica monomers with  $S = 0.69$ . SEM images were obtained on Hitachi S-4500 microscope operating at 10 kV. Before analysis, samples deposited on a 300-mesh carbon coated copper grid, were coated with nm-thick layer of gold and palladium (10 %) with a SC7620 mini sputter coater.

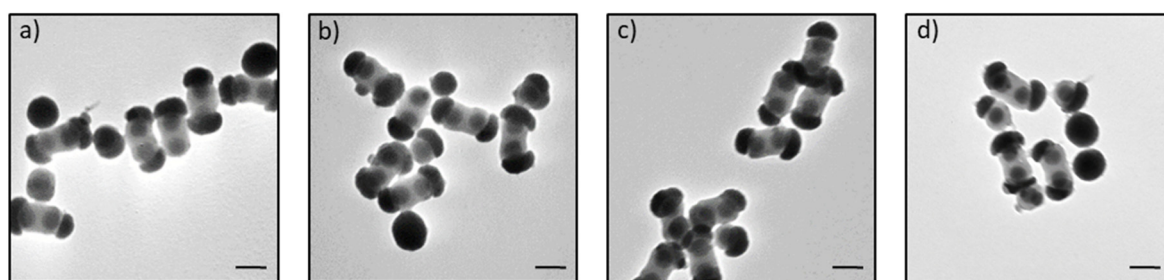

**Figure S6.** Representative TEM images of the silica dimers obtained from 85-nm silica particles ( $S = 1.18$ ) after 3 h of incubation in equivolume THF/ethanol mixture at room temperature on a roller mixer, and after being diluted 20 times in ethanol and stored at 4°C for **a)** 20 h, **b)** 7 days, **c)** 32 days, and **d)** 52 days. Scale bars: 100 nm. This experiment shows that excess ethanol freezes the structure of the assemblies and preserves them over long periods.
